# Supplementary material for: Three-centre two-electron bonds from the quantum interference perspective
Source: Royal Society of Chemistry journal article supplement (doi:10.1039/d2cp00841f), 2022-01-01
Supplement: d2cp00841f1.pdf [file d2cp00841f1.pdf]

## Supplementary Information

### Three-center two-electron bonds from the quantum interference perspective

David Wilian Oliveira de Sousa<sup>1</sup> and Marco Antonio Chaer Nascimento<sup>1\*</sup>

<sup>1</sup>Instituto de Química, Universidade Federal do Rio de Janeiro

Cidade Universitária, CT Bloco A Sala 412, Rio de Janeiro, RJ 21941-909, Brazil

**This supplementary material contains 8 supplemental figures  
(S1-S8) and 1 supplemental table.**

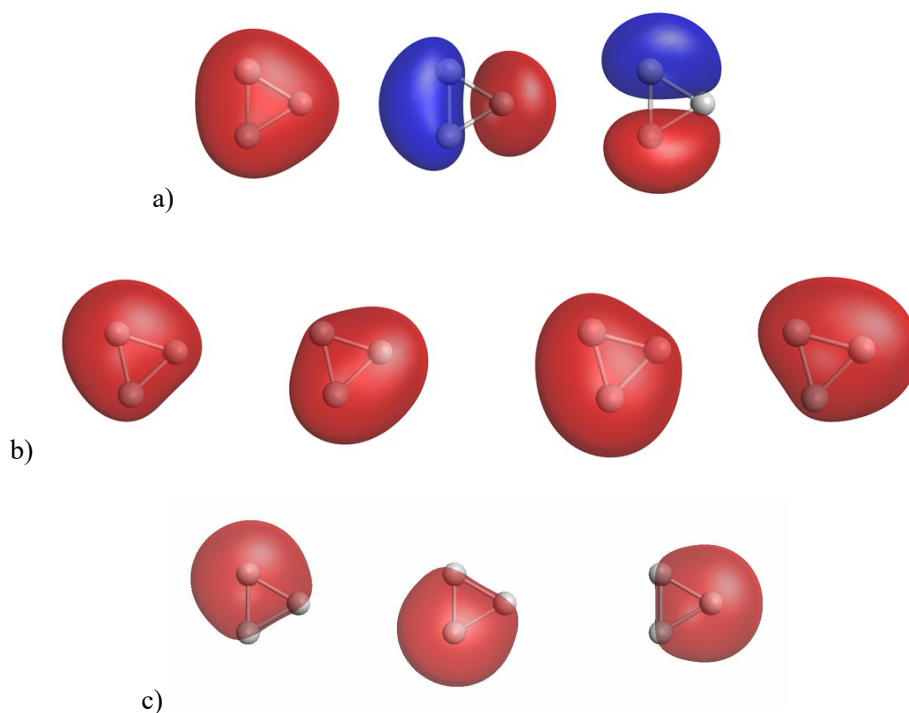

**Figure S1.** Orbitals of the  $H_3^+$  molecule at the CASSCF level (a), GVB-PP structures 1 and 2 (b) and SC(2,3). MC-SC orbitals are equivalent to the combination of GVB-PP structures.

The contour value is 0.1 for all the orbitals.

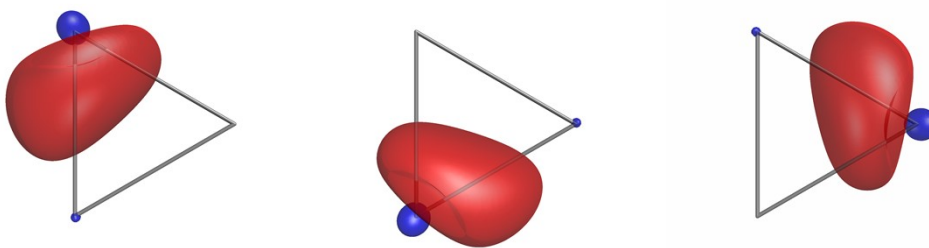

**Figure S2.** Orbitals for the  $\text{Li}_3^+$  molecule at the SC(2,3)/cc-pVTZ level. The contour value is 0.1 for all the orbitals.

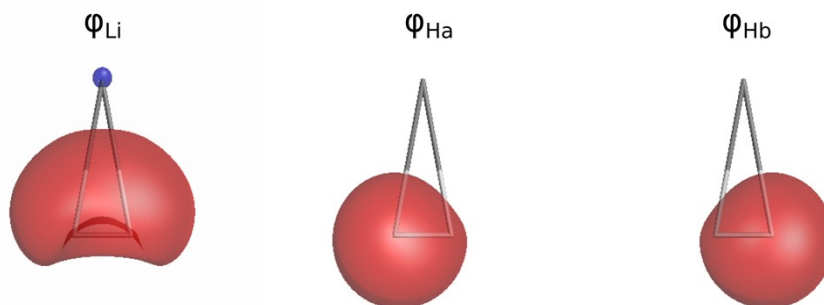

**Figure S3.** Orbitals for  $\text{LiH}_2^+$  calculated at SC(2,3)/cc-pVTZ level. The contour value is 0.1 for all the orbitals.

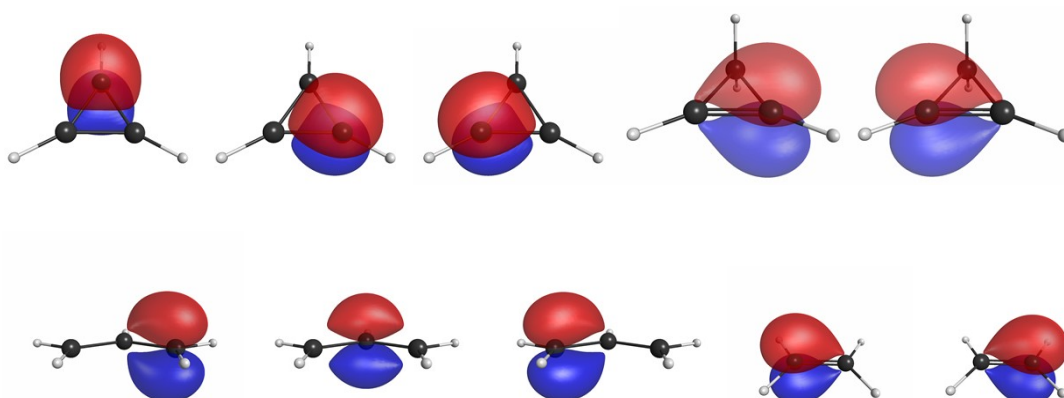

**Figure S4.** Orbitals of the  $\pi$  system for the species  $\text{C}_3\text{H}_3^+$  (top left),  $\text{C}_3\text{H}_4$  (top right),  $\text{C}_3\text{H}_5^+$  (bottom left), and  $\text{C}_2\text{H}_4$  (bottom right). The contour value is 0.1 for all the orbitals.

**Table S1.** Selected molecular parameters of the species  $R_2CBeCR_2$  ( $R = H, CH_3$ ),  $H_2CBe$ , **a**, and **b** at the CASSCF/cc-pVTZ level.

|                                  | R(C-Be) (Å)   | $\theta$ (C-Be-C) (°) | R(C-C) (Å) | R(C-H) (Å) | $\theta$ (H-C-H) (°) |
|----------------------------------|---------------|-----------------------|------------|------------|----------------------|
| $H_2CBeCH_2$                     | 1.6712        | 179.82                | -          | 1.0794     | 111.37               |
| $(CH_3)_2CBeC(CH_3)_2$           | 1.6739        | 180.00                | 1.5112     | -          | -                    |
| $H_2CBe$ ( $^1A_1$ )             | 1.5808        | -                     | -          | 1.0752     | 117.01               |
| $H_2CBe$ ( $^3B_1$ )             | 1.6797        | -                     | -          | 1.0796     | 111.73               |
| <b>Compound a</b> <sup>[a]</sup> | 1.664 / 1.659 | 180.0                 | 1.541      | -          | -                    |
| <b>Compound b</b> <sup>[a]</sup> | 1.659 / 1.657 | 179.3                 | -          | -          | -                    |

[a]: M. Arrowsmith, H. Braunschweig, M.A. Celik, T. Dellermann, R. D. Dewhurst, W. C. Ewing, K. Hammond, T. Kramer, I. Kruppenacher, J. Mies, K. Radacki and J. K. Schuster, Neutral Zero-Valent s-Block Complexes with Strong Multiple Bonding, *Nat. Chem.*, 2016, **8** (9), 890–894. <https://doi.org/10.1038/nchem.2542>.

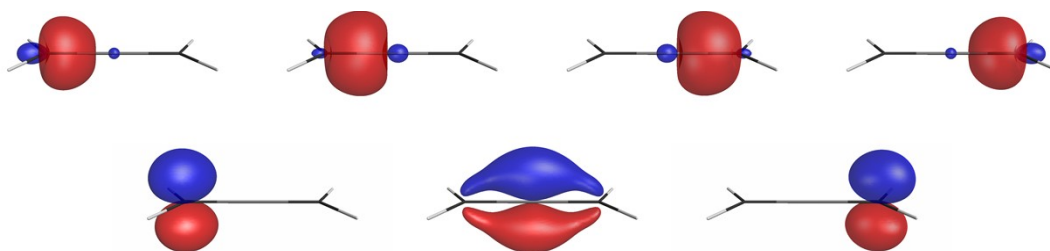

**Figure S5.** Calculated orbitals for  $H_2CBeCH_2$ . The contour value is 0.1 for all the orbitals.

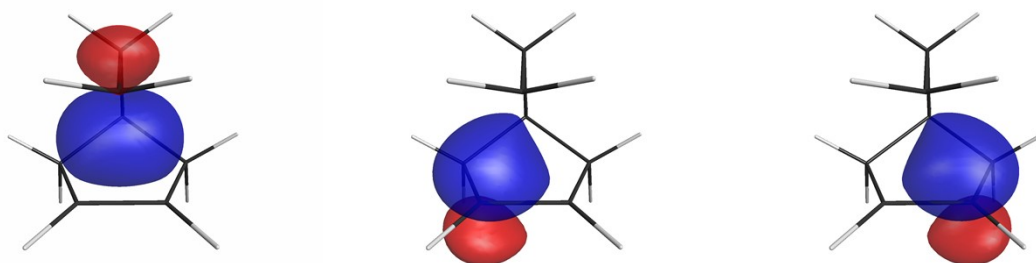

**Figure S6.** Calculated orbitals for the 3c2e bond of the nonclassical structure of the 2-norbornyl cation. The contour value is 0.1 for all the orbitals.

## $C_s(I)$ structure

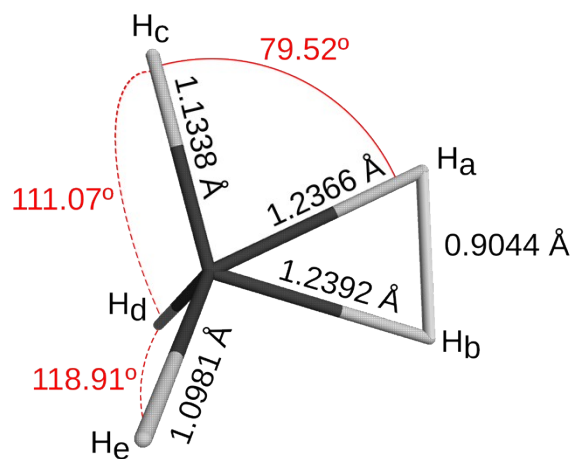

**Figure S7.** CAS(8,9)/aug-cc-pVTZ global minimum of  $CH_5^+$ .

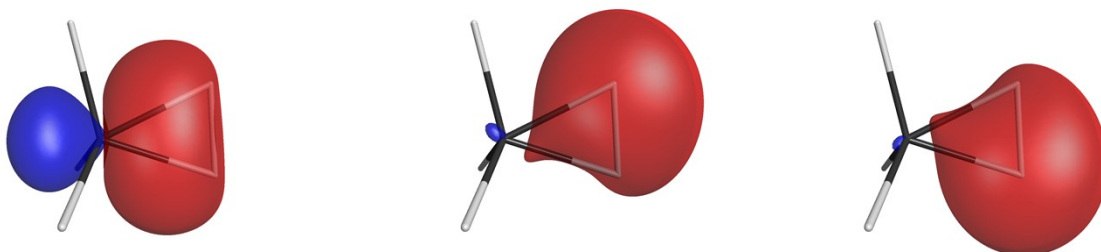

**Figure S8.** Calculated orbitals for the 3c2e bond of the global minimum of  $CH_5^+$ . The contour value is 0.1 for all the orbitals.
